# Supplementary material for: Investigation of Marine-Derived Natural Products as Raf Kinase Inhibitory Protein (RKIP)-Binding Ligands
Source: MDPI journal article supplement (doi:10.3390/md19100581), 2021-10-18
Supplement: s1 [file s1]

Article

# Investigation of Marine-Derived Natural Products as Raf Kinase Inhibitory Protein (RKIP)-Binding Ligands

Shraddha Parate <sup>1</sup>, Vikas Kumar <sup>2</sup>, Jong Chan Hong <sup>1,\*</sup> and Keun Woo Lee <sup>2,\*</sup>

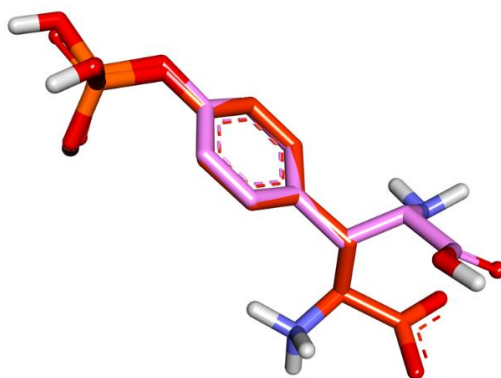

**Figure S1.** Validation of GOLD docking parameters using co-crystallized ligand, PTR (orange) and its docked pose (pink).

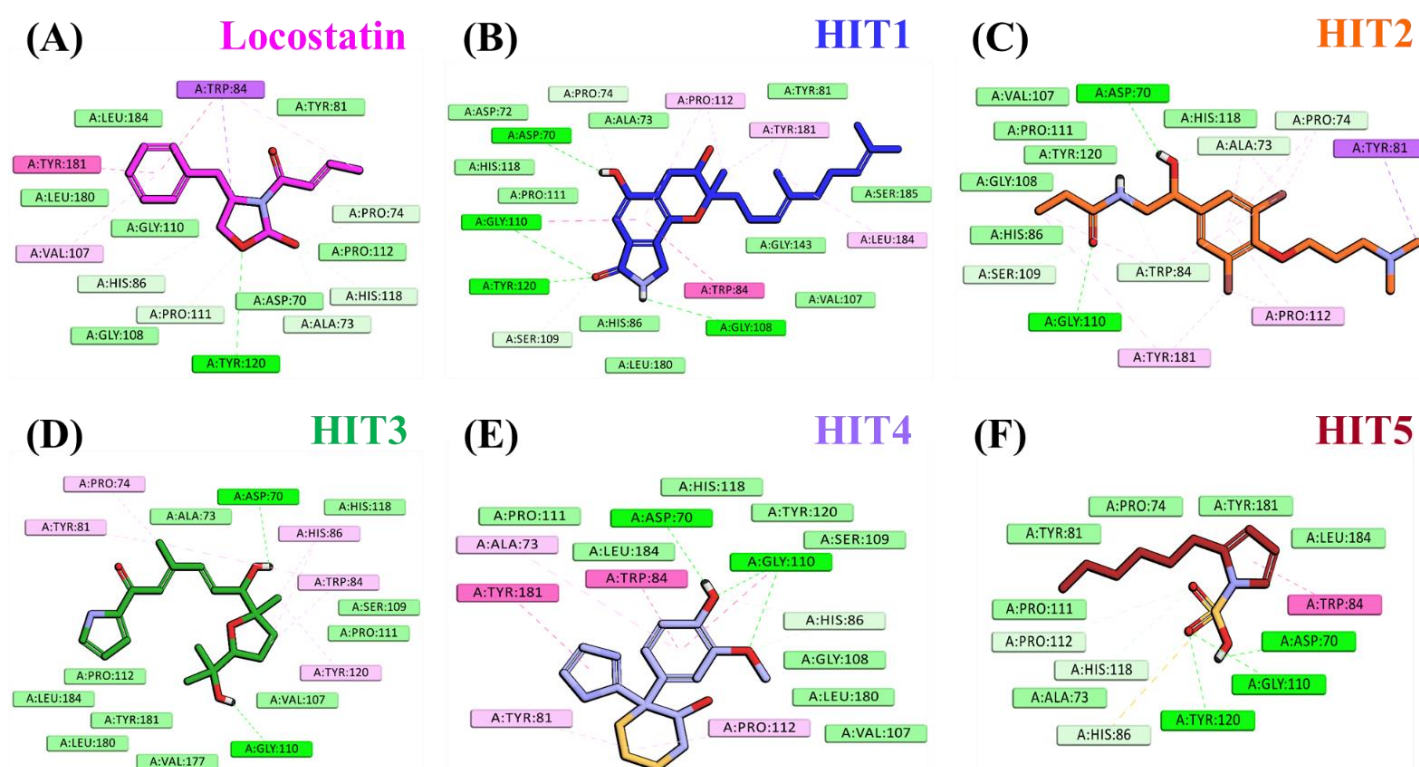

**Figure S2.** The two-dimensional (2D) intermolecular interactions of reference (REF) compound, locostatin and the identified hits with the key residues of RKIP.

**Table S1.** The binding free energy (BFE) scores of reference (REF) locostatin and drug-like Marine Natural Products (MNP) with RKIP (PDB ID: 2QYQ) along with their IUPAC names.

| Compound No. | MNP ID (CAS No)   | BFE scores $\Delta G_{\text{bind}}$ (kJ/mol) | IUPAC Name                                                                                                                       |
|--------------|-------------------|----------------------------------------------|----------------------------------------------------------------------------------------------------------------------------------|
| 1            | 62541-09-7        | -34.910+/-39.452                             | (2Z)-8-Benzyl-2-(4-hydroxybenzylidene)-6-(4-hydroxyphenyl)imidazo[1,2-a]pyrazin-3(2H)-one                                        |
| 2            | 799246-91-6       | -126.597+/-8.883                             | N-(2-{3,5-Dibromo-4-[3-(dimethylamino)propoxy]phenyl}-2-hydroxyethyl)propanamide                                                 |
| 3            | 383191-01-3       | -95.450+/-10.777                             | 4-(4-Hydroxy-3-methoxyphenyl)-4-(1H-imidazol-2-yl)-1,2,3-trithian-5-ol                                                           |
| 4            | 313951-44-9       | -59.456+/-53.152                             | (3E)-4-{2-[(1E)-3-Hydroxy-1-hexen-1-yl]-4-methylphenyl}-3-butenamide                                                             |
| 5            | 61897-90-3        | -67.601+/-13.693                             | 3-acetyl-2-methyl-3'-(4-oxoquinazolin-3-yl)spiro[2,3a-dihydroimidazol[1,2-a]indole-4,5'-tetrahydrofuran]-1,2'-dione              |
| 6            | 302924-16-9       | -57.769+/-15.693                             | 5-[(1S,2S)-1-Hydroxy-3-methyl-2-{2-[(5S)-2-oxo-5-(2-oxopropyl)-2,5-dihydro-3-furanyl]ethyl}-3-buten-1-yl]-4-methyl-2-furaldehyde |
| 7            | 182806-09-3       | -85.303+/-11.793                             | 3-(3-Bromo-4-hydroxyphenyl)-N-[2-(3-bromo-4-hydroxyphenyl)ethyl]-2-hydroxypropanamide                                            |
| 8            | 587875-53-4       | -94.582+/-8.703                              | 2-Hexyl-1H-pyrrole-1-sulfonic acid                                                                                               |
| 9            | 142677-12-1       | -66.536+/-10.545                             | ethyl 3-(1H-indol-3-yl)2-[3-(1H-indol-3-yl)prop-2-enoylamino]propanoate                                                          |
| 10           | 144385-02-4       | -135.283+/-11.815                            | 2-(4,8-dimethylnona-3,7-dienyl)-3,5-dihydro-2-methyl-3,4,8,9-tetrahydropyranol[2,3-e]isoindol-7-one                              |
| 11           | 853885-48-0       | -57.585+/-22.654                             | 6,7-dihydroxy-3,7,11-trimethyl-1-(1H-pyrrol-2-yl)dodeca-2,4,10-trien-1-one                                                       |
| 12           | 853885-46-8       | -115.088+/-9.005                             | 6-hydroxy-6-[5-(1-hydroxy-1-methyl-ethyl)-2-methyl-tetrahydrofuran-2-yl]-3-methyl-1-(1H-pyrrol-2-yl)hexa-2,4-dien-1-one          |
| 13           | 58115-31-4        | -90.472+/-14.096                             | N-[1-benzyl-2[(1-benzyl-2-hydroxy-ethyl)amino]-2-oxo-ethyl]benzamide                                                             |
| 14           | 133812-16-5 (REF) | -90.909+/-9.155                              | (4S)-4-Benzyl-3-[(2E)-2-butenoyl]-1,3-oxazolidin-2-one                                                                           |

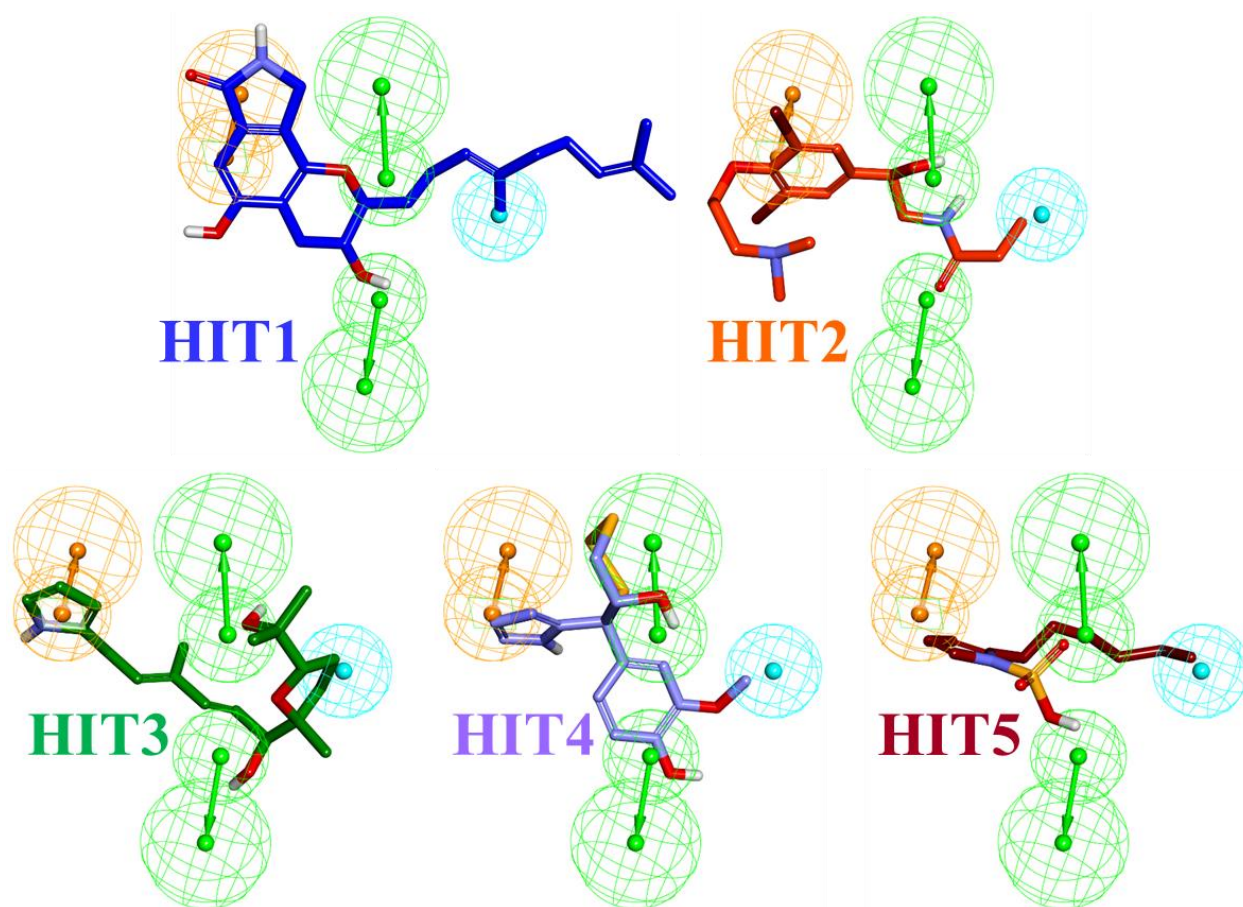

**Figure S3.** The mapping of identified Marine Natural Products (MNP) hits onto the generated pharmacophore model. All hits display the hydrogen bond acceptor (HBA), hydrophobic (HyP) and ring aromatic (RA) pharmacophoric features.
